# Supplementary material for: A biomass-assembled macro/meso-porous nano-scavenger for Hg ion trapping
Source: Royal Society of Chemistry journal article supplement (doi:10.1039/d1nj02877d), 2021-01-01
Supplement: d1nj02877d1.pdf [file d1nj02877d1.pdf]

# A biomass-assembled macro/meso-porous nano-scavenger for Hg ion trapping

*Nan Nan Xia<sup>1</sup>, Bingbing Zhang<sup>2</sup>, Zi Hao Hu<sup>1</sup>, Fangong Kong<sup>1</sup>, Guomin Xu<sup>2\*</sup>, Fei He<sup>3\*</sup>*

<sup>1</sup>State Key Laboratory of Biobased Material and Green Papermaking, Key Laboratory of Pulp & Paper Science and Technology of Shandong Province/Ministry of Education, Qilu University of Technology (Shandong Academy of Sciences), Jinan 250353, China

<sup>2</sup>National Engineering Research Center for Compounding and Modification of Polymer Materials, Guiyang, 550014, China

<sup>3</sup>School of Material Science and Engineering, University of Jinan, Jinan 250022, China

\*Correspondence: pec.gmxu@gzu.edu.cn (G.X.); fei.he@seu.edu.cn (F.H.).

## Characterization

Fourier transform infrared (FTIR) spectra (Bruker VERTEX70 FTIR, Karlsruhe, Germany) were recorded between 400 and 4000 cm<sup>-1</sup> with a resolution of 4 cm<sup>-1</sup> using a KBr pellet technique. The surface microstructures of samples were observed using a Regulus 8220 scanning electron microscope (SEM) (Hitachi High-Technologies Corporation). The transmission electron microscopy (TEM) was carried out on a JEM-2100 Plus microscope (JEOL, Japan) at an accelerating voltage of 200 kV. Surface analyses of LS-CTS-TA before and after Hg<sup>2+</sup> adsorption were obtained by using X-Ray Photoelectron Spectroscopy (XPS) (Al K $\alpha$  X-rays, ESCALAB250Xi, Thermo Fisher Scientific, USA). Peak positions were internally referenced to the C1s peak at 284.6 eV. Nitrogen adsorption/desorption isotherms were measured with a Micromeritics ASAP 2460 adsorptometer (Maize, Georgia, USA) using nitrogen as

the adsorbate at 77 K. All samples were degassed at 150 °C for more than 10 h before analysis.

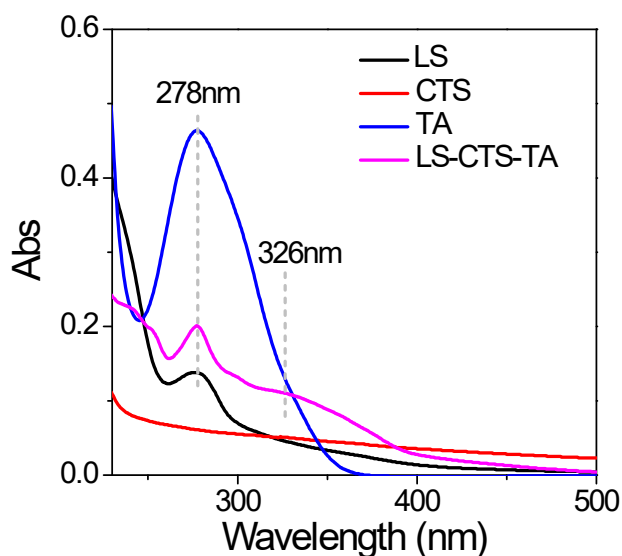

**Figure S1** UV-Vis absorption of LS, CTS, TA and LS-CTS-TA before and after self-assembling.

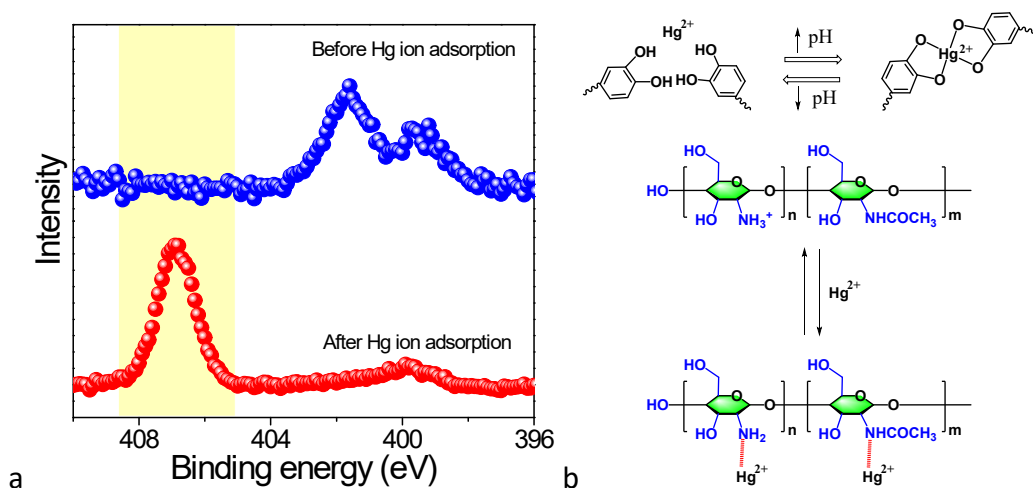

**Figure S2** (a) N1s XPS spectra of LS-CTS-TA before and after adsorption of Hg ion. (b) Possible adsorption and desorption mechanism of Hg<sup>2+</sup> over LS-CTS-TA. <sup>1</sup>.

The catechol–metal coordination bonds possess reversible cleavage and formation capabilities at different pH (See the following Figure S2b), which has been demonstrated [1].

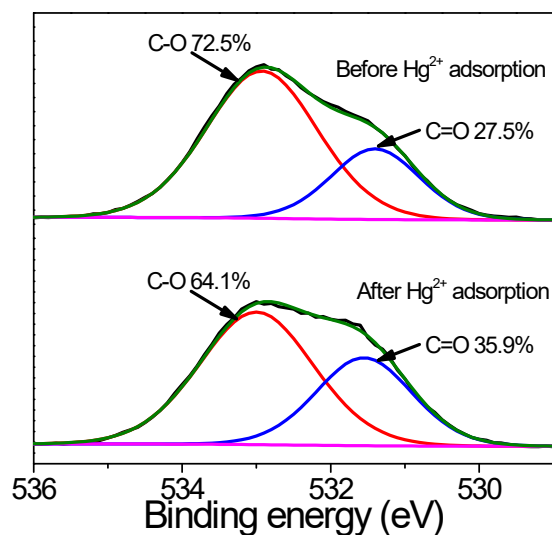

**Figure S3** O1s XPS analysis of LS-CTS-TA before and after adsorption of Hg ion

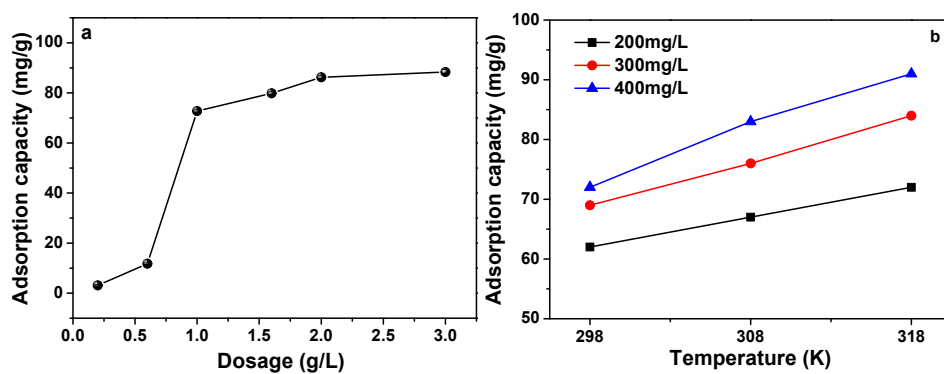

**Figure S4** Adsorption capacity of LS-CTS-TA at different dosage (initial mercury concentration: 300mg/L, volume: 300mL, temperature: 25°C, adsorption time: 2h, pH=7); (b) Adsorption capacity of LS-CTS-TA at different temperatures (initial mercury concentration: 300mg/L, volume: 300mL, adsorption time: 2h, pH=7).

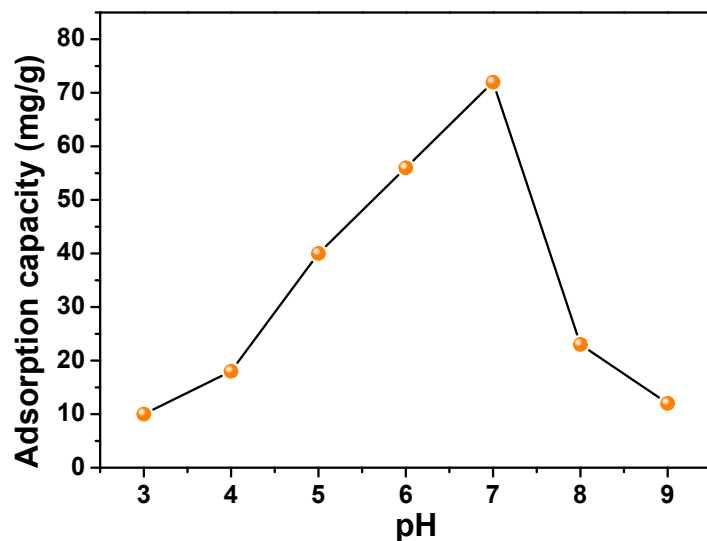

**Figure S5** Adsorption capacity of LS-CTS-TA at different pHs (initial mercury concentration: 300mg/L, volume: 300mL, LS-CTS-TA: 0.3g, temperature: 25°C, adsorption time: 2h).

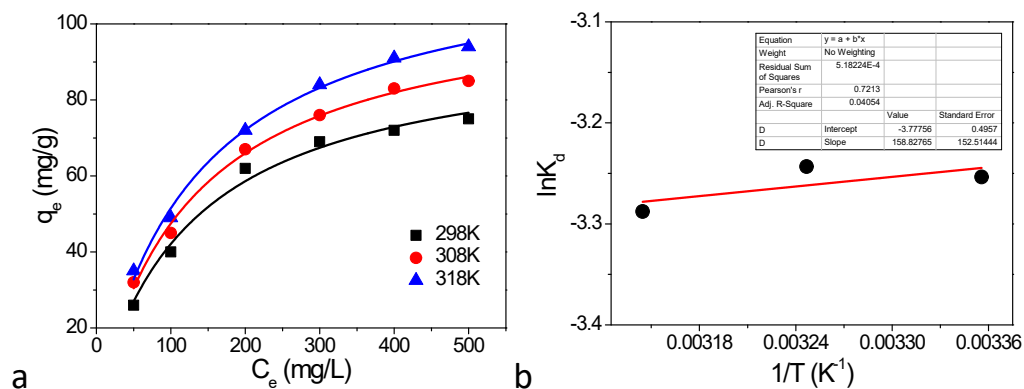

**Figure S6** Adsorption isotherms of Hg ion on the LS-CTS-TA at different temperatures.

Thermodynamic parameters of Gibbs free energy ( $\Delta G^{\circ}$ , kJ/mol), enthalpy ( $\Delta H^{\circ}$ , kJ/mol) and entropy ( $\Delta S^{\circ}$ , kJ/mol/K) can be used to analyze the thermodynamics based on the following equations:

$$\Delta G^{\circ} = \Delta H^{\circ} - T\Delta S^{\circ} \quad \text{Eq. s1}$$

$$\ln K_d = \frac{\Delta S^0}{R} - \frac{\Delta H^0}{RT} \quad \text{Eq. s2}$$

Where, R is 8.314 J/(mol · K).  $K_d$  represented thermodynamic constant, the value of which was equal to that of the Langmuir equilibrium constant (ref: J. Chem. Eng. Data 2009, 54, 1981).

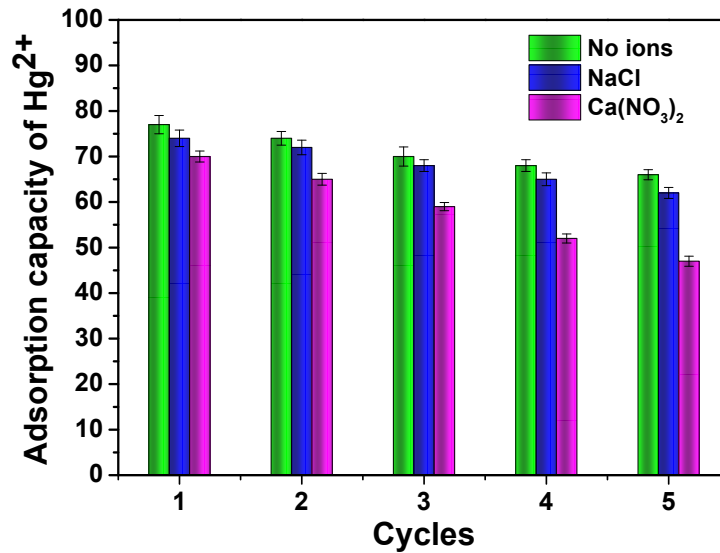

**Figure S7** Adsorption performance of LS-CTS-TA under the interference of NaCl (50mg/L) or Ca(NO<sub>3</sub>)<sub>2</sub> (50mg/L).

**Table S1** Evaluated values of pseudo-first-order and pseudo-second-order rate constants and correlation coefficient for the adsorption of Hg<sup>2+</sup> on LS-CTS-TA.

| Sample    | pseudo-first-order   |        |        | pseudo-second-order    |        |        | Intraparticle diffusion model |       |        |
|-----------|----------------------|--------|--------|------------------------|--------|--------|-------------------------------|-------|--------|
|           | $k_1$                | $q_e$  | $R^2$  | $k_2$                  | $q_e$  | $R^2$  | $k_3$                         | $C$   | $R^2$  |
|           | (min <sup>-1</sup> ) | (mg/g) |        | (kg/mol·min)           | (mg/g) |        |                               |       |        |
| LS-CTS-TA | 0.0316               | 77.46  | 0.9851 | $3.951 \times 10^{-4}$ | 90.68  | 0.9984 | 5.489                         | 8.381 | 0.8962 |

**Table S2** Langmuir and Freundlich isotherm constants of Hg<sup>2+</sup> adsorption on LS-CTS-TA.

| Material  | Langmuir constants |                    |        | Freundlich constants |        |        |
|-----------|--------------------|--------------------|--------|----------------------|--------|--------|
|           | $K_L(\text{L/mg})$ | $q_m(\text{mg/g})$ | $R^2$  | $1/n$                | $K_F$  | $R^2$  |
| LS-CTS-TA | 0.00793            | 95.24              | 0.9935 | 0.46953              | 31.824 | 0.9447 |

**Table S3** Hg<sup>2+</sup> adsorption performances of different materials

| Materials                                                  | pH  | Temperature (°C) | Adsorption isotherm model | Q <sub>m</sub> (mg/g) | References |
|------------------------------------------------------------|-----|------------------|---------------------------|-----------------------|------------|
| Aulfur-modified pine-needle biochar                        | 6.7 | 20               | Freundlich                | 48.2                  | 2          |
| Carboxymethyl cellulose thiol-imprinted polymers           | 5.0 | 25               | Langmuir                  | 81.03                 | 3          |
| Cationic exchange resin of carboxyl banana stem            | 6.0 | 30               | Langmuir                  | 90.88                 | 4a         |
| Activated carbon made from sago waste                      | 5.0 | 30               | Langmuir                  | 55.6                  | 4b         |
| Multi-functionalized corncob-derived biochar               | 6.0 | 25               | Langmuir                  | 14.1                  | 4c         |
| Dumbbell and flower shaped potato starch phosphate polymer | 6.5 | 25               | Langmuir                  | 51.38                 | 4d         |
| Biomass of chlorella vulgaris                              | 5.0 | 20               | Langmuir                  | 32.6                  | 4e         |
| Lignocellulosic materials                                  | 5.0 | 25               | Langmuir                  | 20                    | 4f         |
| Exhausted coffee waste                                     | 7   | 33               | Langmuir                  | 31.75                 | 4g         |
| Guanyl-modified cellulose                                  | 6   | 25               | Langmuir                  | 48                    | 4h         |

**Table S4** Thermodynamic parameters for Hg(II) adsorption over LS-CTS-TA

| $\Delta H^\circ$ (kJ/mol) | $\Delta S^\circ$ (J/mol/K) | $\Delta G^\circ$ (kJ/mol) |       |       |
|---------------------------|----------------------------|---------------------------|-------|-------|
|                           |                            | 298 K                     | 308 K | 318 K |
| -1.32                     | -31.4                      | -8.04                     | -8.35 | -8.66 |

**Supporting references**

- Andersen A.; Krogsgaard M.; Birkedal H., Mussel-inspired self-healing double-cross-linked hydrogels by controlled combination of metal coordination and covalent cross-linking. *Biomacromolecules* **2017**, 19(5): 1402.

2. Jeon, C.; Solis, K. L.; An, H.-R.; Hong, Y.; Igalavithana, A. D.; Ok, Y. S., Sustainable removal of Hg(II) by sulfur-modified pine-needle biochar. *Journal of Hazardous Materials* **2020**, *388*, 122048.
3. Tarisai Velempini, K. P., Xavier Y. Mbianda, Omotayo A. Arotiba, Carboxymethyl cellulose thiol-imprinted polymers: Synthesis, characterization and selective Hg(II) adsorption. *Journal of Environmental Sciences* **2019**, *79*, 16.
4. (a) Anirudhan, T.; Senan, P.; Unnithan, M., Sorptive potential of a cationic exchange resin of carboxyl banana stem for mercury(II) from aqueous solutions. *Separation and Purification Technology* **2007**, *52* (3), 512-519; (b) Kadirvelu, K.; Kavipriya, M.; Karthika, C.; Vennilamani, N.; Pattabhi, S., Mercury (II) adsorption by activated carbon made from sago waste. *Carbon* **2004**, *42* (4), 745-752; (c) Faheem, F.; Bao, J.; Zheng, H.; Tufail, H.; Irshad, S.; Du, J., Adsorption-assisted decontamination of Hg(ii) from aqueous solution by multi-functionalized corncob-derived biochar. *RSC Advances* **2018**, *8* (67), 38425-38435; (d) Bashir, A.; Manzoor, T.; Malik, L. A.; Qureshi, A.; Pandith, A. H., Enhanced and selective adsorption of Zn(II), Pb(II), Cd(II), and Hg(II) Ions by a dumbbell- and flower-shaped potato starch phosphate polymer: A combined experimental and DFT calculation study. *ACS omega* **2020**, *5* (10), 4853-4867; (e) Solisio, C.; Al Arni, S.; Converti, A., Adsorption of inorganic mercury from aqueous solutions onto dry biomass of *Chlorella vulgaris*: kinetic and isotherm study. *Environmental technology* **2019**, *40* (5), 664-672; (f) Arias Arias, F. E.; Beneduci, A.; Chidichimo, F.; Furia, E.; Straface, S., Study of the adsorption of mercury (II) on lignocellulosic materials under static and dynamic conditions. *Chemosphere* **2017**, *180*, 11-23; (g) Mora Alvarez, N. M.; Pastrana, J. M.; Lagos, Y.; Lozada, J. J., Evaluation of mercury (Hg<sup>2+</sup>) adsorption capacity using exhausted coffee waste. *Sustainable Chemistry and Pharmacy* **2018**, *10*, 60-70; (h) Kenawy, I. M.; Hafez, M. A. H.; Ismail, M. A.; Hashem, M. A., Adsorption of Cu(II), Cd(II), Hg(II), Pb(II) and Zn(II) from aqueous single metal solutions by guanyl-modified cellulose. *International journal of biological macromolecules* **2018**, *107* (Pt B), 1538-1549.
